# Supplementary material for: Leptin receptor+ cells promote bone marrow innervation and regeneration by synthesizing nerve growth factor
Source: PubMed Central journal article supplement (PMC10709146; doi:10.1038/s41556-023-01284-9), 2023-11-27
Supplement: 41556_2023_1284_MOESM10_ESM.pdf [file 41556_2023_1284_MOESM10_ESM.pdf]

# Unprocessed images in Figure 6

**r**

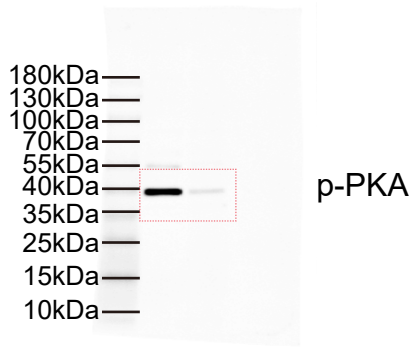

*Adrb2/Adrb3* + -

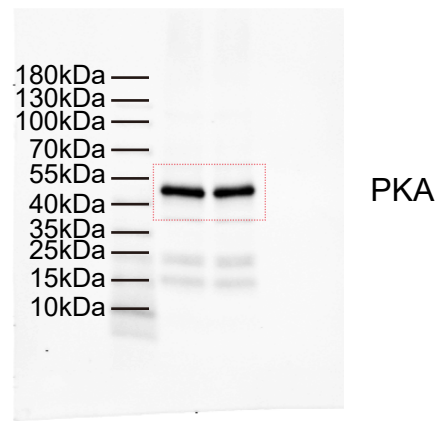

*Adrb2/Adrb3* + -

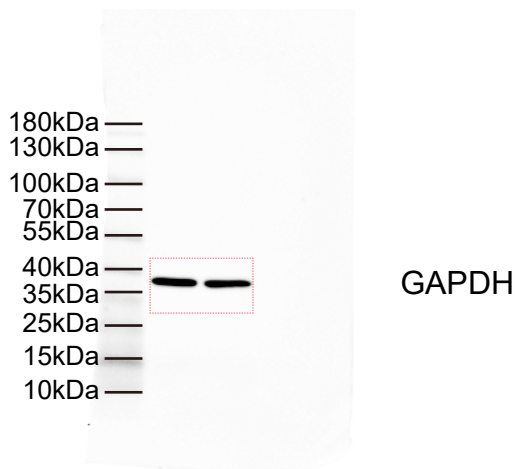

*Adrb2/Adrb3* + -
