# Supplementary material for: Leptin receptor+ cells promote bone marrow innervation and regeneration by synthesizing nerve growth factor
Source: PubMed Central journal article supplement (PMC10709146; doi:10.1038/s41556-023-01284-9), 2023-11-27
Supplement: 41556_2023_1284_MOESM19_ESM.pdf [file 41556_2023_1284_MOESM19_ESM.pdf]

Unprocessed images in Extended Data Figure 8

j

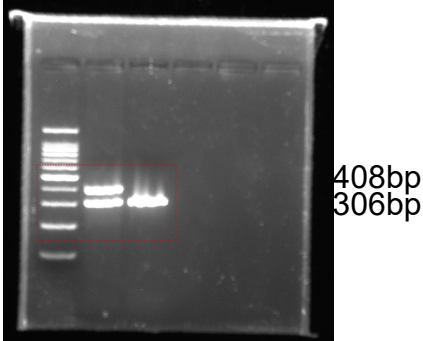

Adrb2 <sup>fl+</sup> +/+

i

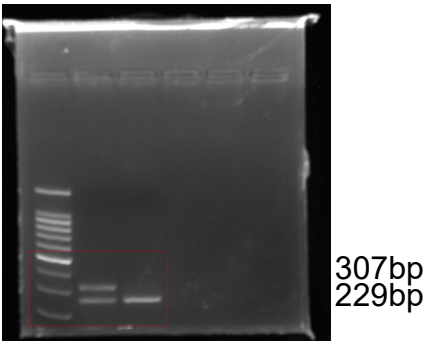

Adrb3 <sup>fl+</sup> +/+
